# Supplementary material for: Evaluation of urinary tissue inhibitor of metalloproteinase-2 in acute kidney injury: a prospective observational study
Source: Springer Nature journal article supplement (doi:10.1186/s13054-014-0716-5), 2014-12-18
Supplement: MOESM1 [file 9780044]

Supplementary Table 1. Biomarkers in established AKI, late-onset AKI, and progression of AKI

|                        | Non-AKI<br>(N=56)    | Established AKI<br>(N=33)           | Late-onset AKI<br>(N=9)              | Progression of AKI<br>(N=16)          |
|------------------------|----------------------|-------------------------------------|--------------------------------------|---------------------------------------|
| Plasma NGAL (ng/mL)    | 80 (60 to 142)       | 400 (227 to 622) <sup>a</sup>       | 196 (101 to 390) <sup>a</sup>        | 261 (124 to 469) <sup>a</sup>         |
| Plasma IL-6 (pg/mL)    | 45.1 (22.9 to 226.3) | 500.6 (62.5 to 5209.6) <sup>a</sup> | 294.4 (68.9 to 10348.2) <sup>a</sup> | 318.5 (120.1 to 14371.8) <sup>a</sup> |
| Plasma EPO (mIU/mL)    | 16.1 (9.9 to 28.5)   | 28.7 (11.4 to 109.4) <sup>a</sup>   | 26.9 (5.85 to 97.9)                  | 33.1 (7.9 to 83.1)                    |
| Urinary TIMP-2 (ng/mL) | 2.08 (0.72 to 4.59)  | 12.64 (2.45 to 35.83) <sup>a</sup>  | 3.94 (1.75 to 28.75)                 | 8.92 (2.37 to 47.41) <sup>a</sup>     |
| Urinary NAG (U/L)      | 5.9 (3.1 to 15.0)    | 36.1 (15.7 to 76.1) <sup>a</sup>    | 26.4 (6.0 to 44.4) <sup>a</sup>      | 33.9 (9.7 to 97.7) <sup>a</sup>       |

<sup>a</sup> $p < .05$  vs. Non-AKI
