# Supplementary material for: Evaluation of urinary tissue inhibitor of metalloproteinase-2 in acute kidney injury: a prospective observational study
Source: Springer Nature journal article supplement (doi:10.1186/s13054-014-0716-5), 2014-12-18
Supplement: MOESM2 [file 9780044]

Supplementary Table 2. AUC-ROC values for detection of established AKI, late-onset AKI, or progression of AKI

|                | Established AKI<br>(N=33)        | Late-onset AKI<br>(N=9) | Progression of AKI<br>(N=16)     |
|----------------|----------------------------------|-------------------------|----------------------------------|
| Plasma NGAL    | 0.84 (0.72 to 0.91) <sup>a</sup> | 0.77 (0.55 to 0.90)     | 0.76 (0.60 to 0.87)              |
| Plasma IL-6    | 0.70 (0.57 to 0.80)              | 0.72 (0.49 to 0.87)     | 0.74 (0.59 to 0.85)              |
| Plasma EPO     | 0.65 (0.53 to 0.76)              | 0.54 (0.27 to 0.79)     | 0.58 (0.39 to 0.75)              |
| Urinary TIMP-2 | 0.75 (0.62 to 0.85)              | 0.66 (0.44 to 0.83)     | 0.73 (0.55 to 0.85)              |
| Urinary NAG    | 0.83 (0.72 to 0.90) <sup>a</sup> | 0.75 (0.48 to 0.91)     | 0.77 (0.58 to 0.89) <sup>b</sup> |

<sup>a</sup> $p < .05$  vs. IL-6 and EPO, <sup>b</sup> $p < .05$  vs. EPO
