# Supplementary material for: Evaluation of urinary tissue inhibitor of metalloproteinase-2 in acute kidney injury: a prospective observational study
Source: Springer Nature journal article supplement (doi:10.1186/s13054-014-0716-5), 2014-12-18
Supplement: MOESM3 [file 9780044]

Supplementary Table 3. Subanalysis of septic and non-septic population

|                | Severe AKI ( <i>N</i> =19)<br>in septic patients ( <i>N</i> =41) | Severe AKI ( <i>N</i> =8)<br>in non-septic patients ( <i>N</i> =57) |
|----------------|------------------------------------------------------------------|---------------------------------------------------------------------|
| Clinical Model | 0.91 (0.76 to 0.97)                                              | 0.85 (0.65 to 0.95)                                                 |
| + NGAL         | 0.91 (0.77 to 0.97)                                              | 0.83 (0.60 to 0.94)                                                 |
| + IL-6         | 0.91 (0.75 to 0.97)                                              | 0.86 (0.69 to 0.95)                                                 |
| + EPO          | 0.96 (0.86 to 0.99)                                              | 0.86 (0.66 to 0.95)                                                 |
| + TIMP-2       | 0.96 (0.86 to 0.99)                                              | 0.86 (0.70 to 0.95)                                                 |
| + NAG          | 0.99 (0.92 to 1.00)                                              | 0.88 (0.68 to 0.96)                                                 |

AUC-ROC values for severe AKI detection when each biomarker is added to the clinical model.

Clinical model incorporates age, sex, complication of diabetes, medical admission, and serum creatinine.

No significant difference is found.
