# Supplementary material for: Evaluation of urinary tissue inhibitor of metalloproteinase-2 in acute kidney injury: a prospective observational study
Source: Springer Nature journal article supplement (doi:10.1186/s13054-014-0716-5), 2014-12-18
Supplement: MOESM4 [file 9780044]

Supplementary Table 4. Subanalysis of septic and non-septic population

|                | Severe AKI ( <i>N</i> =19)<br>in septic patients ( <i>N</i> =41) |                                  | Severe AKI ( <i>N</i> =8)<br>in non-septic patients ( <i>N</i> =57) |                      |
|----------------|------------------------------------------------------------------|----------------------------------|---------------------------------------------------------------------|----------------------|
|                | Continuous NRI                                                   | IDI                              | Continuous NRI                                                      | IDI                  |
| Clinical Model |                                                                  |                                  |                                                                     |                      |
| + NGAL         | -9 (-68 to 51)                                                   | 0.00 (-0.02 to 0.03)             | 56 (-17 to 128)                                                     | 0.07 (-0.00 to 0.15) |
| + IL-6         | 23 (-37 to 84)                                                   | 0.01 (-0.02 to 0.03)             | 93 (40 to 147) <sup>a</sup>                                         | 0.05 (-0.07 to 0.16) |
| + EPO          | 75 (18 to 131) <sup>a</sup>                                      | 0.12 (0.02 to 0.21) <sup>a</sup> | 10 (-64 to 85)                                                      | 0.00 (-0.03 to 0.04) |
| + TIMP-2       | 103 (51 to 156) <sup>a</sup>                                     | 0.11 (0.00 to 0.21) <sup>a</sup> | -10 (-85 to 64)                                                     | 0.00 (-0.04 to 0.05) |
| + NAG          | 179 (151 to 207) <sup>a</sup>                                    | 0.30 (0.15 to 0.46) <sup>a</sup> | 14 (-60 to 89)                                                      | 0.06 (-0.04 to 0.16) |

For continuous NRI and IDI, each model is made by adding each biomarker to the clinical model, which incorporated age, sex, complication of diabetes, medical admission, and serum creatinine.

<sup>a</sup>*p* < .05 vs. clinical model
